# Supplementary material
Source: Springer Nature journal article supplement (https://www.springermedizin.de/resource/supplementary/13012_2010_418_MOESM3_ESM.pdf/9629720)
Supplement: MOESM3 [file 9629720]

**Context and Resources**

**Health Issue**  
*(Smoking Cessation in  
hospital setting)*

Quality Cycle

**Program**  
*(OMSC)*

Problem Definition

**Drivers**  
*(Doctors, hospital  
admin, nurses, etc.)*

Political Economy
